# Supplementary material for: Crystal Phase Ionic Liquids for Energy Applications: Heat Capacity Prediction via a Hybrid Group Contribution Approach
Source: MDPI journal article supplement (doi:10.3390/molecules29092130), 2024-05-03
Supplement: s1 [file s1]

## Supporting Information 1

### Crystal phase ionic liquids for energy applications: Heat capacity prediction via a hybrid group contribution approach

Moh'd Basel Shahin<sup>1</sup>, Shehzad Liaqat<sup>1</sup>, Paul Nancarrow<sup>1,2</sup> Sarah McCormack<sup>2</sup>

<sup>1</sup>*Department of Chemical & Biological Engineering, American University of Sharjah, PO Box 26666, Sharjah, United Arab Emirates*

<sup>2</sup>*Department of Civil, Structural and Environmental Engineering, Trinity College Dublin, Dublin 2, D02 PN40, Ireland*

*\*Corresponding author: Email: pnancarrow@aus.edu*

Table S1. List and description of the derived indirect parameters introduced into the GCM.

| Parameter                         | Definition                                                                                                                                     |
|-----------------------------------|------------------------------------------------------------------------------------------------------------------------------------------------|
| (SO <sub>2</sub> ) <sub>2</sub> N | An additional anion subgroup to consider its effect on the heat capacity.                                                                      |
| MW                                | The IL's molecular weight which accounts for the effect of size on the heat capacity.                                                          |
| Normalized MW                     | The normalized molecular weight of the IL:                                                                                                     |
| Total C in Core                   | The count of carbon atoms in the cation core which considers how the number of carbon atoms in the cation core affects the heat capacity.      |
| Longest Chain                     | The carbon atom count in the longest chain of the IL which considers the influence on the heat capacity based on the hydrocarbon chain length. |
| Number of Chains                  | The number of chains in the IL which considers the impact of structural symmetry and weight distribution on the heat capacity.                 |
| Long Chain                        | The molecular weight of the longest chain which accounts for the change in heat capacity based on the variations in chain lengths.             |
| Ln (long chain)                   | The natural logarithm of the molecular weight of the longest chain which incorporates the effect of both the positive and the negative values. |
| Ln (MW of Cation)                 | The natural logarithm of the molecular weight of the cation which accounts for how the cation's structure affects the heat capacity.           |

|                      |                                                                                                                                                                                                   |
|----------------------|---------------------------------------------------------------------------------------------------------------------------------------------------------------------------------------------------|
| Size Parameter       | The ratio of the molecular weight of the longest cation chain to the molecular weight of the entire cation which takes into account the impact of weight distribution on the heat capacity.       |
| Cation/Anion         | The ratio of the molecular weight of the cation to that of the anion which considers the impact of cation and anion size difference on the heat capacity.                                         |
| All Other/LongChain  | The ratio of all other groups attached to the cation core, excluding the longest chain, to the weight of the longest chain which reflects the impact of structural symmetry on the heat capacity. |
| AllOther             | The weight of all additional groups connected to the cation core, excluding the longest chain.                                                                                                    |
| Total Hetero in Core | The count of heteroatoms in the cation core, excluding carbon and hydrogen which captures the heat capacity variation associated with non-carbon and non-hydrogen heteroatoms in the cation core. |
| Total Cation Cores   | The total number of cation cores which considers how the heat capacity changes with the number of cation cores.                                                                                   |
| Number of Rings      | The number of rings in the IL which considers any variations in heat capacity based on the presence of aromatic rings.                                                                            |
| Ring CH (Non-Core)   | The number of CH rings outside the cation core which takes into account their contribution towards the heat capacity.                                                                             |

Table S2. Functional group building blocks utilized in the GCM.

| GCM | Cation Cores  | Cation Subgroups   | Anion Subgroups      | Added Indirect Parameters |
|-----|---------------|--------------------|----------------------|---------------------------|
|     | Imidazolium   | –H                 | –CH <sub>3</sub> .1  | MW                        |
|     | Pyridinium    | –CH <sub>3</sub>   | –CH <sub>2</sub> –.1 | NormalizedMW              |
|     | Pyrrolidinium | –CH <sub>2</sub> – | > CH–                | Total C in Core           |
|     | Piperidinium  | –CH <              | > C <.1              | Total Hetero in Core      |
|     | Ammonium      | –OH                | > CO                 | TotalCationCores          |
|     | Phosphonium   | –O–                | –COO–                | Number of Rings           |
|     | Thiophenium   | > C <              | –HCOO                | Ring CH (Non-Core)        |
|     | Quinolinium   | –COO               | –OH.1                | Longest Chain             |
|     | Azepanium     | –CN                | –O– [–O]             | NumberofChains            |
|     |               | –NH <sub>2</sub>   | –CN.1                | LongChain                 |
|     |               | –SO <sub>2</sub> – | –N– [> N–]           | lnlongchain               |
|     |               | Phenyl             | –NO <sub>2</sub>     | AllOther/LongChain        |
|     |               | –Benzyl            | –S–                  | AllOther                  |

|  |  |                    |                      |                                   |
|--|--|--------------------|----------------------|-----------------------------------|
|  |  | –Vinyl             | –SO <sub>2</sub> –.1 | Size Parameter                    |
|  |  | –CF <sub>2</sub> – | –CF <sub>3</sub> .1  | Cation/Anion                      |
|  |  | –CF <sub>3</sub>   | –CF <sub>2</sub> –.1 | lnMWCation                        |
|  |  |                    | –F.1                 | (SO <sub>2</sub> ) <sub>2</sub> N |
|  |  |                    | –Cl.1                |                                   |
|  |  |                    | –Br.1                |                                   |
|  |  |                    | –P                   |                                   |
|  |  |                    | –B                   |                                   |
|  |  |                    | –I                   |                                   |
|  |  |                    | CH– (ring)           |                                   |
|  |  |                    | C– (ring)            |                                   |
|  |  |                    | › CO (ring)          |                                   |
|  |  |                    | –O– (ring)           |                                   |

Table S3. Group contribution parameters of each group for developed model.

| Groups             | $a_i$     | $b_i$     | $c_i$     |
|--------------------|-----------|-----------|-----------|
| Imidazolium        | -1.22E+03 | 8.34E+02  | -1.47E+02 |
| Pyridinium         | 2.61E+03  | -1.72E+03 | 2.90E+02  |
| Pyrrolidinium      | -3.22E+03 | 2.10E+03  | -3.49E+02 |
| Piperidinium       | 1.01E-03  | -2.50E-06 | 0.00E+00  |
| Ammonium           | 7.40E+00  | 2.64E+01  | -1.87E+01 |
| Phosponium         | -3.12E+02 | 3.74E+02  | -9.80E+01 |
| Thiophenium        | -2.86E-01 | -8.43E-01 | -2.51E+00 |
| quinolinium        | 4.77E+02  | -3.15E+02 | 5.38E+01  |
| Azepanium          | 4.20E-04  | 0.00E+00  | 0.00E+00  |
| –H                 | 1.19E+03  | -7.75E+02 | 1.29E+02  |
| –CH <sub>3</sub>   | 2.18E+03  | -1.42E+03 | 2.23E+02  |
| –CH <sub>2</sub> – | -1.13E+02 | 1.36E+02  | -3.35E+01 |
| –CH ‹              | 2.98E-03  | -2.79E-09 | 0.00E+00  |
| –OH                | 2.95E+02  | -7.86E+01 | -2.16E+01 |
| –O–                | -5.46E-05 | 0.00E+00  | 0.00E+00  |
| › C ‹              | 1.47E-04  | 0.00E+00  | 0.00E+00  |
| –COO               | -4.07E-05 | 0.00E+00  | 0.00E+00  |
| –CN                | -9.01E-01 | -2.69E+00 | -8.00E+00 |

|                      |           |           |           |
|----------------------|-----------|-----------|-----------|
| -NH2                 | 5.74E-05  | 0.00E+00  | 0.00E+00  |
| -SO2-                | 3.28E-05  | 0.00E+00  | 0.00E+00  |
| Phenyl               | 4.14E-06  | 0.00E+00  | 0.00E+00  |
| -Benzyl              | -1.63E+03 | 1.23E+03  | -2.43E+02 |
| -Vinyl               | 2.89E-06  | 0.00E+00  | 0.00E+00  |
| -CF2-                | 8.73E-05  | 0.00E+00  | 0.00E+00  |
| -CF3                 | -7.61E-05 | 0.00E+00  | 0.00E+00  |
| -CH3.1               | -6.15E+02 | 7.32E+02  | -1.87E+02 |
| -CH2-.1              | -2.91E-05 | 0.00E+00  | 0.00E+00  |
| > CH-                | -9.95E-06 | 0.00E+00  | 0.00E+00  |
| > C <.1              | -5.36E-07 | 0.00E+00  | 0.00E+00  |
| > CO                 | -9.30E-06 | 0.00E+00  | 0.00E+00  |
| -COO-                | 6.12E+01  | -1.39E+02 | 4.17E+01  |
| -HCOO                | 8.05E-05  | 0.00E+00  | 0.00E+00  |
| -OH.1                | 8.04E-05  | 0.00E+00  | 0.00E+00  |
| -O- [-O]             | 8.58E+01  | -1.75E+02 | 5.24E+01  |
| -CN.1                | -6.24E-05 | 0.00E+00  | 0.00E+00  |
| -N- [> N-]           | -2.44E-05 | 0.00E+00  | 0.00E+00  |
| -NO2                 | -4.71E+02 | 4.50E+02  | -1.07E+02 |
| -S-                  | -5.64E-05 | 0.00E+00  | 0.00E+00  |
| -SO2-.1              | -3.33E+02 | 3.63E+02  | -8.90E+01 |
| -CF3.1               | -7.33E+02 | 7.44E+02  | -1.77E+02 |
| -CF2-.1              | -5.21E+02 | 5.32E+02  | -1.26E+02 |
| -F.1                 | -1.51E+02 | 1.40E+02  | -3.17E+01 |
| -Cl.1                | -1.38E+02 | 1.09E+02  | -2.64E+01 |
| -Br.1                | -4.05E+02 | 3.27E+02  | -7.11E+01 |
| -P                   | -4.12E+01 | 6.17E+01  | -1.66E+01 |
| -B                   | 1.23E+02  | -1.48E+02 | 3.65E+01  |
| -I                   | -7.88E+02 | 7.19E+02  | -1.63E+02 |
| CH- (ring)           | -6.39E+01 | 4.65E+01  | -8.68E+00 |
| C- (ring)            | -3.19E+01 | 2.32E+01  | -4.34E+00 |
| > CO (ring)          | -1.11E-05 | 0.00E+00  | 0.00E+00  |
| -O- (ring)           | -2.29E-06 | 0.00E+00  | 0.00E+00  |
| MW                   | 2.27E+07  | -2.05E+00 | 1.11E+00  |
| NormalizedMW         | -3.32E+09 | -1.38E+03 | 2.67E+02  |
| Total C in Core      | -1.10E+03 | 7.37E+02  | -1.27E+02 |
| Total Hetero in Core | 2.81E+03  | -1.84E+03 | 3.11E+02  |
| TotalCationCores     | -1.66E+03 | 1.30E+03  | -2.71E+02 |
| Nitro                | -7.64E-03 | 2.78E-05  | 0.00E+00  |
| Number of Rings      | -2.50E+03 | 1.81E+03  | -3.44E+02 |
| Ring CH (Non-Core)   | 1.91E+03  | -1.26E+03 | 2.15E+02  |

|                    |           |           |           |
|--------------------|-----------|-----------|-----------|
| Longest Chain      | -4.74E+01 | -4.15E+00 | 7.28E+00  |
| NumberofChains     | -7.89E+02 | 5.27E+02  | -7.50E+01 |
| LongChain          | 2.91E+00  | 3.71E-01  | -5.68E-01 |
| Inlongchain        | -1.57E+02 | 1.54E+02  | -3.59E+01 |
| AllOther/LongChain | -3.15E-01 | 1.14E+01  | -4.45E+00 |
| AllOther           | -1.50E+01 | 9.71E+00  | -1.65E+00 |
| Size Parameter     | 1.04E+03  | -1.06E+03 | 2.47E+02  |
| Cation/Anion       | 3.13E+01  | -3.65E+01 | 6.86E+00  |
| InMWCation         | -4.16E+02 | 5.21E+02  | -1.34E+02 |
| (SO2)2N            | -7.10E+02 | 7.72E+02  | -1.86E+02 |
| InMWAnion          | -1.23E+02 | 2.62E+02  | -8.81E+01 |
| intercept          | -6.99E+10 |           |           |

### Sample Calculation

**Component name** = 1-methyl-3-propylimidazolium bromide

**Temperature** = 53.39 K

$$C_p = R[A + B\left(\frac{T}{100}\right) + C\left(\frac{T}{100}\right)^2]$$

Where  $A = \sum(a_i \times n_i)$ ,  $B = \sum(b_i \times n_i)$ ,  $C = \sum(c_i \times n_i)$  and  $a_i$ ,  $b_i$  and  $c_i$  are the contribution parameters of the group,  $i$ ,  $R$  is the universal gas constant which is equal to 8.314472 J/mol.K, and  $n_i$  is the frequency of occurrence of the group,  $i$ .

Table S4. Group contribution parameters and frequency of occurrence of the groups for the 1-methyl-3-propylimidazolium bromide used for sample calculation using developed GCM.

| Groups      | ai        | bi        | ci        | ni |
|-------------|-----------|-----------|-----------|----|
| Imidazolium | -1.22E+03 | 8.34E+02  | -1.47E+02 | 1  |
| Pyridinium  | 2.61E+03  | -1.72E+03 | 2.90E+02  | 0  |

|               |           |           |           |   |
|---------------|-----------|-----------|-----------|---|
| Pyrrolidinium | -3.22E+03 | 2.10E+03  | -3.49E+02 | 0 |
| Piperidinium  | 1.01E-03  | -2.50E-06 | 0.00E+00  | 0 |
| Ammonium      | 7.40E+00  | 2.64E+01  | -1.87E+01 | 0 |
| Phosphonium   | -3.12E+02 | 3.74E+02  | -9.80E+01 | 0 |
| Thiophenium   | -2.86E-01 | -8.43E-01 | -2.51E+00 | 0 |
| quinolinium   | 4.77E+02  | -3.15E+02 | 5.38E+01  | 0 |
| Azepanium     | 4.20E-04  | 0.00E+00  | 0.00E+00  | 0 |
| -H            | 1.19E+03  | -7.75E+02 | 1.29E+02  | 3 |
| -CH3          | 2.18E+03  | -1.42E+03 | 2.23E+02  | 2 |
| -CH2-         | -1.13E+02 | 1.36E+02  | -3.35E+01 | 2 |
| -CH <         | 2.98E-03  | -2.79E-09 | 0.00E+00  | 0 |
| -OH           | 2.95E+02  | -7.86E+01 | -2.16E+01 | 0 |
| -O-           | -5.46E-05 | 0.00E+00  | 0.00E+00  | 0 |
| > C <         | 1.47E-04  | 0.00E+00  | 0.00E+00  | 0 |
| -COO          | -4.07E-05 | 0.00E+00  | 0.00E+00  | 0 |
| -CN           | -9.01E-01 | -2.69E+00 | -8.00E+00 | 0 |
| -NH2          | 5.74E-05  | 0.00E+00  | 0.00E+00  | 0 |
| -SO2-         | 3.28E-05  | 0.00E+00  | 0.00E+00  | 0 |
| Phenyl        | 4.14E-06  | 0.00E+00  | 0.00E+00  | 0 |
| -Benzyl       | -1.63E+03 | 1.23E+03  | -2.43E+02 | 0 |
| -Vinyl        | 2.89E-06  | 0.00E+00  | 0.00E+00  | 0 |
| -CF2-         | 8.73E-05  | 0.00E+00  | 0.00E+00  | 0 |
| -CF3          | -7.61E-05 | 0.00E+00  | 0.00E+00  | 0 |
| -CH3.1        | -6.15E+02 | 7.32E+02  | -1.87E+02 | 0 |
| -CH2-.1       | -2.91E-05 | 0.00E+00  | 0.00E+00  | 0 |
| > CH-         | -9.95E-06 | 0.00E+00  | 0.00E+00  | 0 |
| > C <.1       | -5.36E-07 | 0.00E+00  | 0.00E+00  | 0 |
| > CO          | -9.30E-06 | 0.00E+00  | 0.00E+00  | 0 |
| -COO-         | 6.12E+01  | -1.39E+02 | 4.17E+01  | 0 |
| -HCOO         | 8.05E-05  | 0.00E+00  | 0.00E+00  | 0 |
| -OH.1         | 8.04E-05  | 0.00E+00  | 0.00E+00  | 0 |
| -O- [-O]      | 8.58E+01  | -1.75E+02 | 5.24E+01  | 0 |
| -CN.1         | -6.24E-05 | 0.00E+00  | 0.00E+00  | 0 |
| -N- [> N-]    | -2.44E-05 | 0.00E+00  | 0.00E+00  | 0 |
| -NO2          | -4.71E+02 | 4.50E+02  | -1.07E+02 | 0 |
| -S-           | -5.64E-05 | 0.00E+00  | 0.00E+00  | 0 |
| -SO2-.1       | -3.33E+02 | 3.63E+02  | -8.90E+01 | 0 |
| -CF3.1        | -7.33E+02 | 7.44E+02  | -1.77E+02 | 0 |
| -CF2-.1       | -5.21E+02 | 5.32E+02  | -1.26E+02 | 0 |
| -F.1          | -1.51E+02 | 1.40E+02  | -3.17E+01 | 0 |
| -Cl.1         | -1.38E+02 | 1.09E+02  | -2.64E+01 | 0 |

|                      |           |           |           |           |
|----------------------|-----------|-----------|-----------|-----------|
| -Br.1                | -4.05E+02 | 3.27E+02  | -7.11E+01 | 1         |
| -P                   | -4.12E+01 | 6.17E+01  | -1.66E+01 | 0         |
| -B                   | 1.23E+02  | -1.48E+02 | 3.65E+01  | 0         |
| -I                   | -7.88E+02 | 7.19E+02  | -1.63E+02 | 0         |
| CH- (ring)           | -6.39E+01 | 4.65E+01  | -8.68E+00 | 0         |
| C- (ring)            | -3.19E+01 | 2.32E+01  | -4.34E+00 | 0         |
| > CO (ring)          | -1.11E-05 | 0.00E+00  | 0.00E+00  | 0         |
| -O- (ring)           | -2.29E-06 | 0.00E+00  | 0.00E+00  | 0         |
| MW                   | 2.27E+07  | -2.05E+00 | 1.11E+00  | 205.1     |
| NormalizedMW         | -3.32E+09 | -1.38E+03 | 2.67E+02  | -1.128061 |
| Total C in Core      | -1.10E+03 | 7.37E+02  | -1.27E+02 | 3         |
| Total Hetero in Core | 2.81E+03  | -1.84E+03 | 3.11E+02  | 2         |
| TotalCationCores     | -1.66E+03 | 1.30E+03  | -2.71E+02 | 1         |
| Nitro                | -7.64E-03 | 2.78E-05  | 0.00E+00  | 0         |
| Number of Rings      | -2.50E+03 | 1.81E+03  | -3.44E+02 | 1         |
| Ring CH (Non-Core)   | 1.91E+03  | -1.26E+03 | 2.15E+02  | 0         |
| Longest Chain        | -4.74E+01 | -4.15E+00 | 7.28E+00  | 3         |
| NumberOfChains       | -7.89E+02 | 5.27E+02  | -7.50E+01 | 2         |
| LongChain            | 2.91E+00  | 3.71E-01  | -5.68E-01 | 43        |
| Inlongchain          | -1.57E+02 | 1.54E+02  | -3.59E+01 | 3.7612    |
| AllOther/LongChain   | -3.15E-01 | 1.14E+01  | -4.45E+00 | 0.418605  |
| AllOther             | -1.50E+01 | 9.71E+00  | -1.65E+00 | 18        |
| Size Parameter       | 1.04E+03  | -1.06E+03 | 2.47E+02  | 0.343725  |
| Cation/Anion         | 3.13E+01  | -3.65E+01 | 6.86E+00  | 1.56375   |
| InMWCation           | -4.16E+02 | 5.21E+02  | -1.34E+02 | -0.393552 |
| (SO2)2N              | -7.10E+02 | 7.72E+02  | -1.86E+02 | 0         |
| InMWAnion            | -1.23E+02 | 2.62E+02  | -8.81E+01 | -0.83613  |

All below calculations were done using excel:

**A**= 8.410E+09 K<sup>-1</sup>, **B**= 5.22 K<sup>-1</sup>, **C**= 0.809 K<sup>-2</sup>, **R**= 8.314 J·mol<sup>-1</sup>·K<sup>-1</sup>, **T**= 53.39 K

**Intercept**= -6.99E+10 J·mol<sup>-1</sup>·K<sup>-1</sup>

$$C_p = 8.314 * [8.410E + 09 + (5.22)(\frac{53.39}{100}) + (0.809) \left(\frac{53.39}{100}\right)^2] + -6.99E+10 ]$$

$C_{P\text{ cal}} = 76.8 \text{ J} \cdot \text{mol}^{-1} \cdot \text{K}^{-1}$  (calculated from equation)

$C_{P\text{ pred}} = 76.81 \text{ J} \cdot \text{mol}^{-1} \cdot \text{K}^{-1}$  (predicted by python/modelling)

$C_{P\text{ actual}} = 66.92 \text{ J} \cdot \text{mol}^{-1} \cdot \text{K}^{-1}$  (experimental value)
